# Supplementary material for: Health care utilisation preceding relapse or second malignant neoplasm after childhood acute lymphoblastic leukaemia: a population-based matched cohort study
Source: PubMed Central journal article supplement — BMJ Open. 2021 Aug 19;11(8):e050285. doi: 10.1136/bmjopen-2021-050285 (PMC8378397; doi:10.1136/bmjopen-2021-050285), 2021-08-19
Supplement: bmjopen-2021-050285supp002.pdf [file bmjopen-2021-050285supp002.pdf]

**Table S2.**

Information about contacts to general practice obtained from the Danish National Health Insurance Service Register

| Contact type                 | Speciality code | Time code   | Services                                                                                                                             |
|------------------------------|-----------------|-------------|--------------------------------------------------------------------------------------------------------------------------------------|
| <b>Daytime contacts</b>      | 80              | 1           |                                                                                                                                      |
|                              |                 |             | 0101<br>0102<br>0105<br>0201<br>0411<br>0421<br>0431<br>0441<br>0451<br>0461<br>0491                                                 |
| <b>Out-of-hours contacts</b> | 80              | 8<br>9      |                                                                                                                                      |
|                              |                 |             | 0101<br>0102<br>0471<br>0501                                                                                                         |
| <b>Diagnostic procedures</b> | 80              | 1<br>8<br>9 |                                                                                                                                      |
| Blood test                   |                 |             | 2101<br>2601<br>4309<br>4311<br>4312<br>4544<br>4611<br>7108<br>7110<br>7115<br>7120<br>7125<br>7126<br>7136<br>7150<br>7159<br>7168 |

|                          |  |  |                                                                                      |
|--------------------------|--|--|--------------------------------------------------------------------------------------|
|                          |  |  | 7177<br>7184<br>7186<br>7256<br>7263<br>7301<br>7302<br>7305<br>7309<br>7330<br>7403 |
| Urine test               |  |  | 2132<br>4308<br>7101<br>7102<br>7122<br>7189                                         |
| Strep throat test        |  |  | 4310<br>7109                                                                         |
| Pulmonary functions test |  |  | 4543<br>7113<br>7121<br>7183                                                         |
| Electrocardiogram        |  |  | 4313<br>7155<br>7156                                                                 |
